# Supplementary material for: Green synthesis of CQDs for determination of iron and isoniazid in pharmaceutical formulations
Source: Royal Society of Chemistry journal article supplement (doi:10.1039/d2ay01793h), 2023-01-01
Supplement: d2ay01793h1.pdf [file d2ay01793h1.pdf]

## **Electronic supplementary information**

### **Green synthesis of CQDs for determination of iron and isoniazid in pharmaceutical formulations**

Wenzhan Yu<sup>a</sup>, Qian Li<sup>b</sup>, Liqiong He<sup>c</sup>, Renlong Zhou<sup>c</sup>, Lifu Liao<sup>b</sup>, Jinhua Xue <sup>\*c</sup> and  
Xilin Xiao<sup>\*a</sup>

<sup>a</sup> School of Pharmaceutical Science, University of South China, Hengyang Hunan  
421001, PR China

<sup>b</sup> School of Chemistry and Chemical Engineering, University of South China,  
Hengyang Hunan 421001, PR China

<sup>c</sup> School of Public Health, University of South China, Hengyang Hunan 421001, PR  
China

\* Corresponding authors

E-mail address: 862774797@qq.com; xiaoxl2001@163.com.

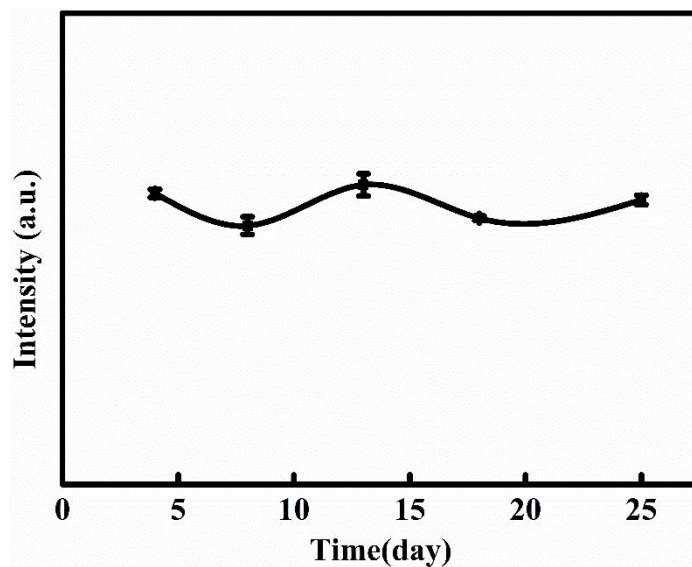

Fig. S1 Stability test of CQDs

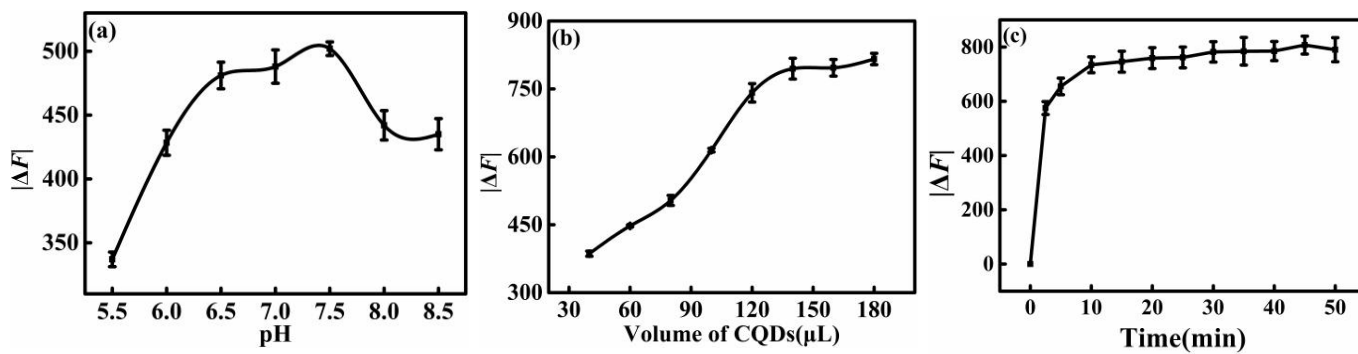

Fig. S2 Optimization of detection conditions for  $\text{Fe}^{3+}$  detection. (a) pH. (b) Volume of CQDs. (c) Reaction time.

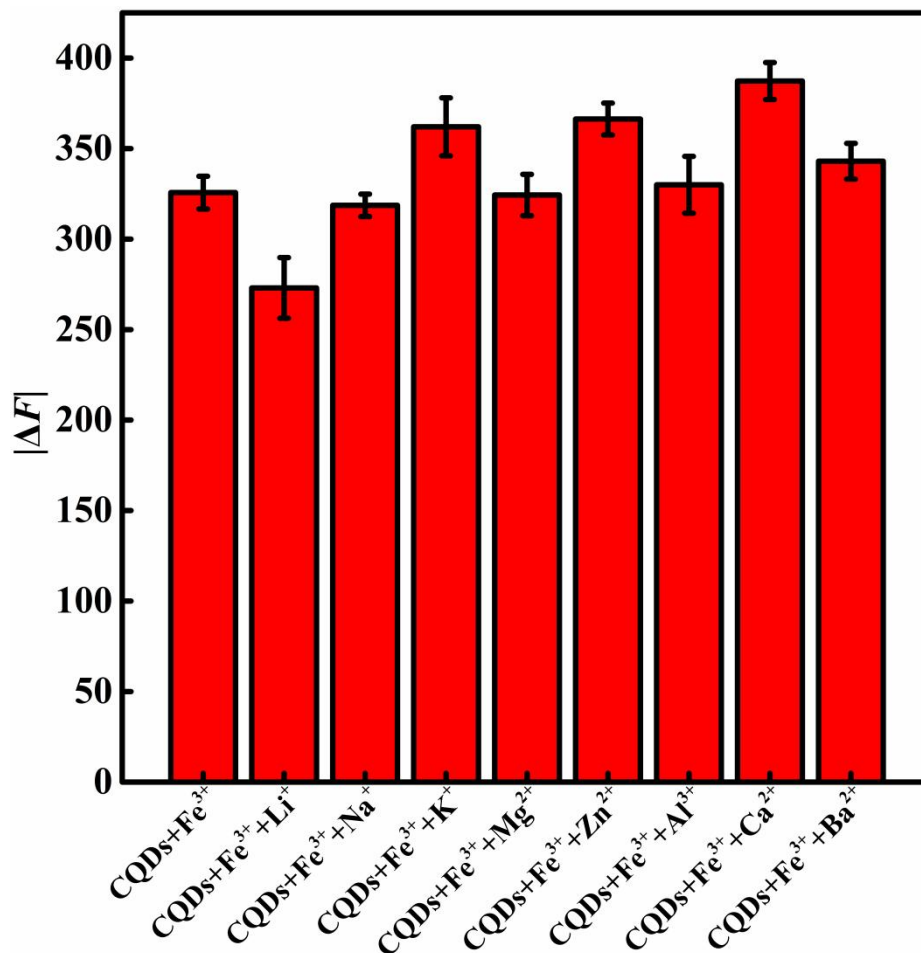

Fig. S3 Selectivity of CQDs for Fe<sup>3+</sup> detection.

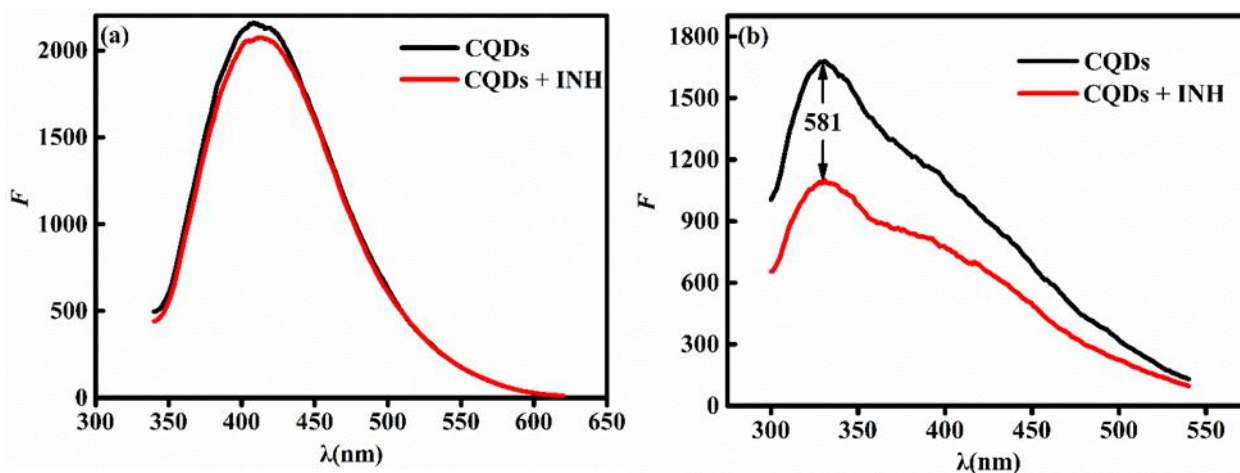

Fig. S4 Optimization of excitation wavelength for INH detection. (a) The fluorescence spectra ( $\lambda_{\text{Ex}} = 320 \text{ nm}$ ) of the CQDs solution and the mixed solution containing CQDs and INH. (b) The fluorescence spectra ( $\lambda_{\text{Ex}} = 280 \text{ nm}$ ) of the CQDs solution and the mixed solution containing CQDs and INH.

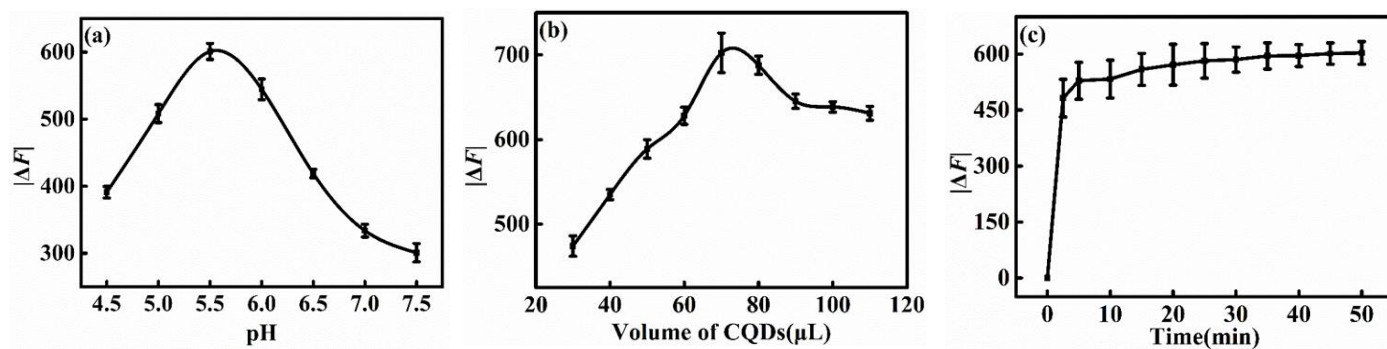

**Fig. S5** Optimization of detection conditions for INH detection. (a) pH. (b) Volume of CQDs. (c) Reaction time.

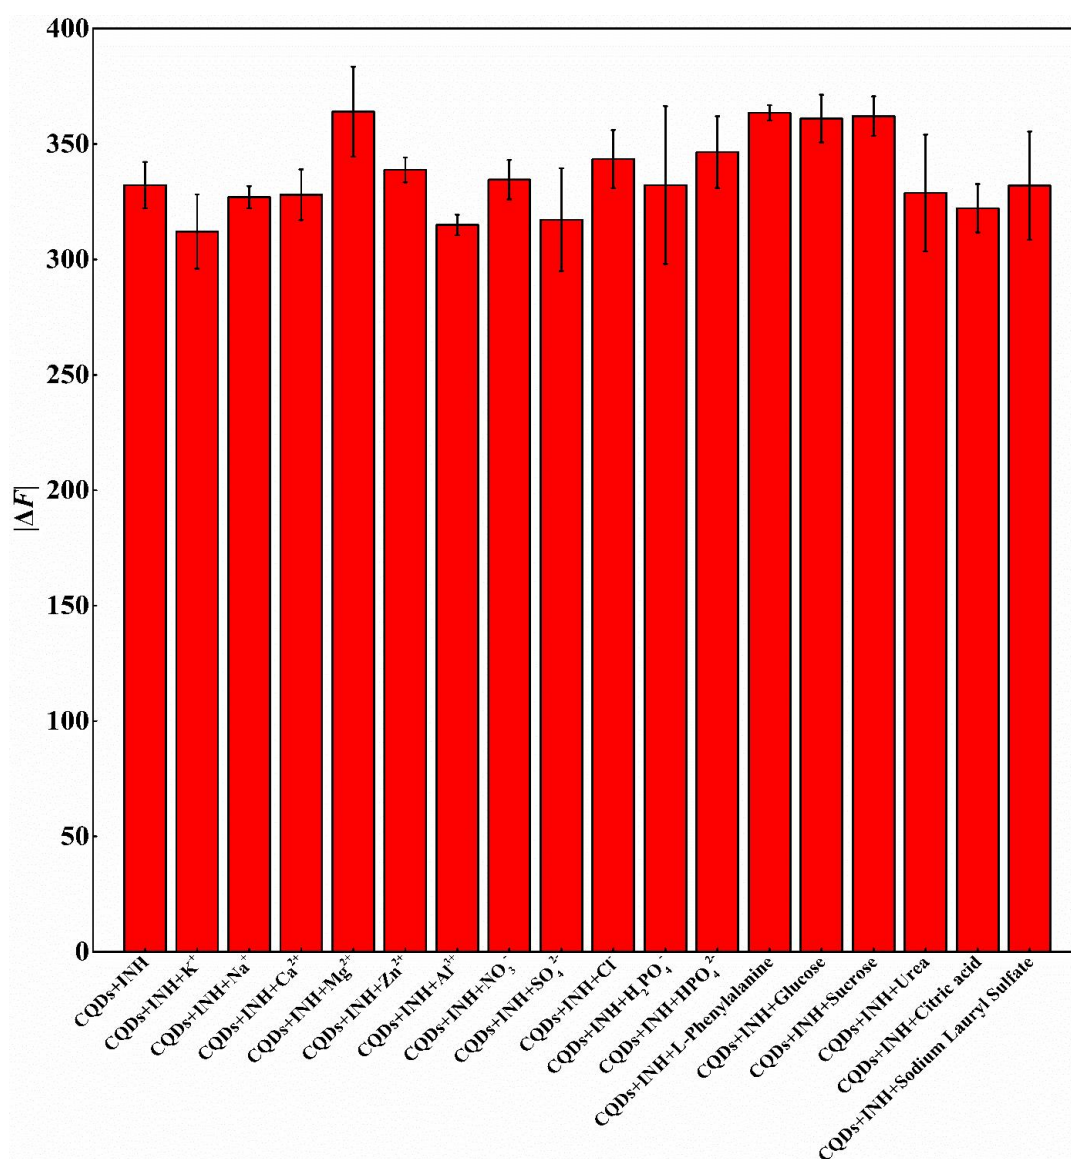

**Fig. S6** Selectivity of CQDs for INH detection.

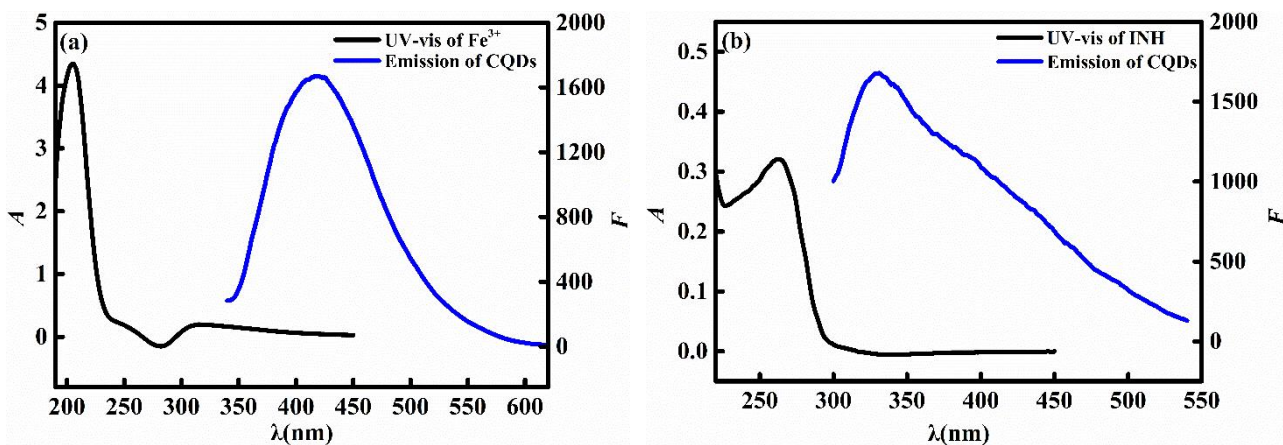

Fig. S7 The UV-vis absorption spectra of Fe<sup>3+</sup>/INH (black line) and the fluorescence emission spectra of CQDs (blue line).

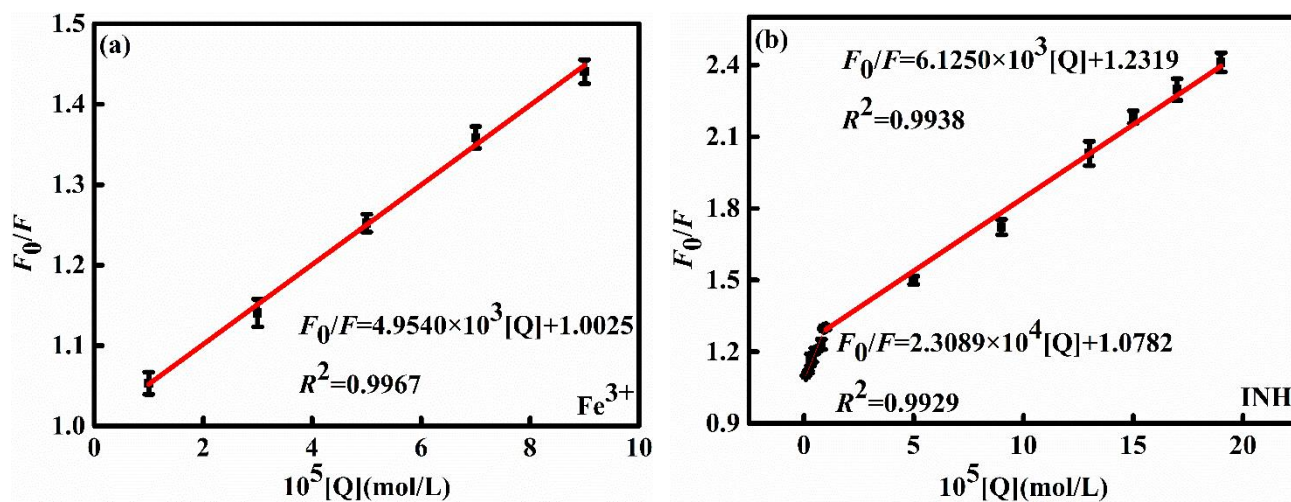

Fig. S8 Stern-Volmer plots for the solution systems of CQDs and Fe<sup>3+</sup>/INH.

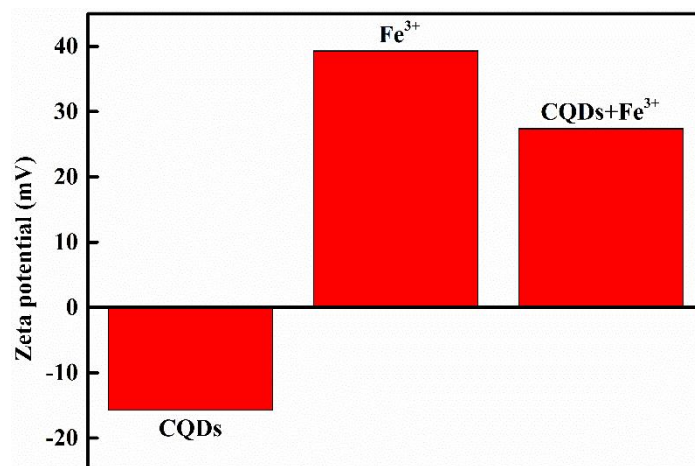

Fig.S9 Zeta potential values of CQDs, Fe<sup>3+</sup> and CQDs + Fe<sup>3+</sup>.

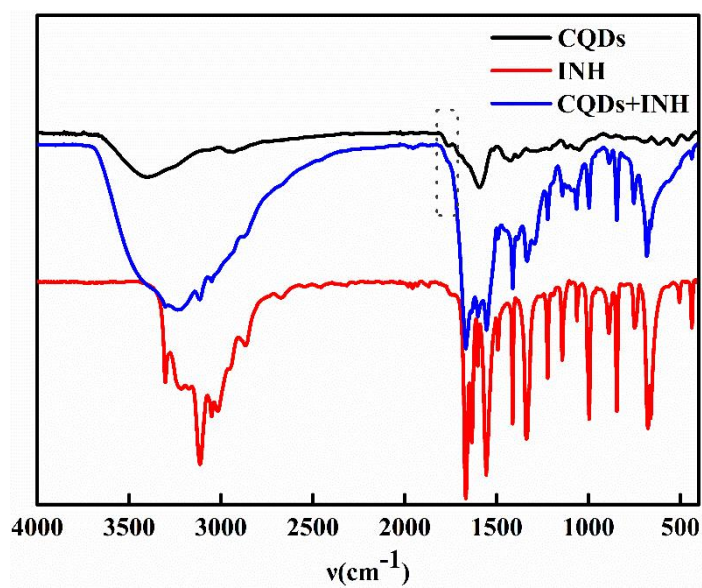

Fig. S10 FT-IR spectra of CQDs, INH and CQDs + INH.

**Table S1** Performance comparison of different CQDs for detection of Fe<sup>3+</sup> and INH.

| Sensors                  | Detection        | Carbon source                                  | Synthesis Method | Post-modification/ functionalisation | LOD (μmol/L) | Ref       |
|--------------------------|------------------|------------------------------------------------|------------------|--------------------------------------|--------------|-----------|
| N-CQDs                   | Fe <sup>3+</sup> | Wolfberry                                      | Hydrothermal     | No                                   | 3            | 1         |
| CDs-4-MU                 | Fe <sup>3+</sup> | D-arginine                                     | Hydrothermal     | Yes                                  | 0.68         | 2         |
| CDs                      | Fe <sup>3+</sup> | Asp, DABSA                                     | Hydrothermal     | No                                   | 1.51         | 3         |
| N-CQDs                   | Fe <sup>3+</sup> | Chitosan                                       | Hydrothermal     | No                                   | 0.15         | 4         |
| CQDs                     | Fe <sup>3+</sup> | Citric acid, 1-aminopropyl-3-methylimidazolium | Hydrothermal     | No                                   | 13.68        | 5         |
| CDs                      | Fe <sup>3+</sup> | B. ovalifoliolata bark extract                 | Hydrothermal     | No                                   | 0.41         | 6         |
| N, P-CDs                 | Fe <sup>3+</sup> | Citric acid, diammonium hydrogen phosphate     | Hydrothermal     | No                                   | 20           | 7         |
| N-CDs                    | Fe <sup>3+</sup> | Chionanthus retusus fruit extract              | Hydrothermal     | No                                   | 70           | 8         |
| CQDs                     | Fe <sup>3+</sup> | Camphor leaves                                 | Hydrothermal     | No                                   | 8.16         | This work |
| Cu-doped CDs             | INH              | Chitosan, gum tragacanth                       | Hydrothermal     | Yes                                  | 0.0084       | 9         |
| N-CDs & MnO <sub>2</sub> | INH              | Liu-bao tea, ethylene diamine                  | Hydrothermal     | No                                   | 0.7          | 10        |
| Au@N-CD                  | INH              | Citric acid, urea                              | Hydrothermal     | Yes                                  | 0.06         | 11        |
| FCDS                     | INH              | Folic acid                                     | Pyrolytic        | No                                   | 1.15         | 12        |
| CQDs                     | INH              | Camphor leaves                                 | Hydrothermal     | No                                   | 1.14         | This work |

Asp: L-aspartic acid  
DABSA: 2,5-diaminobenzenesulfonic acid

**Table S2** Results for the detection of iron in spiked iron supplements (n=6).

| <b>Samples</b> | <b>Found</b><br>( $\times 10^{-5}$ mol/L) | <b>Added</b><br>( $\times 10^{-5}$ mol/L) | <b>Total Found</b><br>( $\times 10^{-5}$ mol/L) | <b>Recovery</b><br>(%) |
|----------------|-------------------------------------------|-------------------------------------------|-------------------------------------------------|------------------------|
| 1              | 4.742 $\pm$ 0.288                         | 5.0                                       | 9.560 $\pm$ 0.321                               | 96.36 $\pm$ 3.28       |
| 2              | 4.371 $\pm$ 0.208                         | 5.0                                       | 9.355 $\pm$ 0.505                               | 99.68 $\pm$ 5.37       |

**Table S3** Results for the detection of INH in spiked isoniazid tablets (n=6).

| <b>Samples</b> | <b>Found</b><br>( $\times 10^{-5}$ mol/L) | <b>Added</b><br>( $\times 10^{-5}$ mol/L) | <b>Total Found</b><br>( $\times 10^{-5}$ mol/L) | <b>Recovery</b><br>(%) |
|----------------|-------------------------------------------|-------------------------------------------|-------------------------------------------------|------------------------|
| 1              | 0.4769 $\pm$ 0.0222                       | 0.35                                      | 0.8170 $\pm$ 0.0362                             | 97.16 $\pm$ 4.67       |
|                | 8.9583 $\pm$ 0.3309                       | 6.0                                       | 14.7525 $\pm$ 0.1959                            | 96.57 $\pm$ 2.92       |
| 2              | 0.5011 $\pm$ 0.0313                       | 0.35                                      | 0.8530 $\pm$ 0.0457                             | 100.54 $\pm$ 4.93      |
|                | 8.6319 $\pm$ 0.2609                       | 6.0                                       | 14.7502 $\pm$ 0.2664                            | 101.97 $\pm$ 2.24      |



## References

1. L. Gu, J. Zhang, G. Yang, Y. Tang, X. Zhang, X. Huang, W. Zhai, E. K. Fodjo and C. Kong, *Food Chemistry*, 2022, **376**, 131898.
2. H. Cai, Y. Zhu, H. Xu, H. Chu, D. Zhang and J. Li, *Spectrochimica Acta Part A: Molecular and Biomolecular Spectroscopy*, 2021, **246**, 119033.
3. H. Cai, H. Xu, H. Chu, J. Li and D. Zhang, *Journal of Materials Chemistry B*, 2021, **9**, 767-782.
4. L. Zhao, Y. Wang, X. Zhao, Y. Deng and Y. Xia, *Polymers*, 2019, **11**, 1731.
5. Z. Xie, X. Sun, J. Jiao and X. Xin, *Colloids and Surfaces A: Physicochemical and Engineering Aspects*, 2017, **529**, 38-44.
6. G. Venkatesan, V. Rajagopalan and S. N. Chakravarthula, *Journal of Environmental Chemical Engineering*, 2019, **7**, 103013.
7. S. Chandra, D. Laha, A. Pramanik, A. Ray Chowdhuri, P. Karmakar and S. K. Sahu, *Luminescence*, 2016, **31**, 81-87.
8. R. Atchudan, T. N. J. I. Edison, D. Chakradhar, S. Perumal, J.-J. Shim and Y. R. Lee, *Sensors and Actuators B: Chemical*, 2017, **246**, 497-509.
9. Z. Shekarbeygi, N. Farhadian, M. Ansari, M. Shahlaei and S. Moradi, *Spectrochimica Acta Part A: Molecular and Biomolecular Spectroscopy*, 2020, **228**, 117848.
10. K. Ma, L. Liang, X. Zhou, W. Tan, O. Hu and Z. Chen, *Spectrochimica Acta Part A: Molecular and Biomolecular Spectroscopy*, 2021, **247**, 119097.
11. T. Hallaj and M. Amjadi, *New Journal of Chemistry*, 2019, **43**, 5980-5986.
12. J. Qin, L. Zhang and R. Yang, *Journal of Nanoparticle Research*, 2019, **21**, 59.
